# Supplementary material for: A low-cost acoustic permeameter
Source: Copernicus journal article supplement (doi:10.5194/gi-2016-13), 2016-07-19
Supplement: Supplementary file [file gi-2016-13-RC2-supplement.pdf]

**A Low-cost acoustic permeameter**

Stephen A. Drake, John S. Selker, Chad W. Higgins

Reviewer: Nicholas J. Kinar, Global Institute for Water Security (GIWS)  
University of Saskatchewan, Saskatoon, Saskatchewan, Canada

---

27 December 2016

**A. General Comments**

The paper describing a low-cost acoustic permeameter is a worthwhile contribution to the journal and should be published. However, the revision removed much of the testing related to snow, which I believe is an important part of a paper published in a journal related to geoscientific instrumentation. The measurements on snow included in the first submitted draft are interesting and should be retained since snow is a natural porous material (a geomaterial) that is not artificial and not the same as foam samples.

Since this paper is a proof-of-concept, the field site location where the snow was sampled is not of particular importance since the focus of the paper is on testing of porous materials. Similar to Figure 1, the snow could have been sampled from a backyard location. If this was the case, it is okay to state that the snow was sampled at a backyard location, and perhaps a follow-up paper could be written testing the permeameter at a University of Oregon field site. It is important to describe how the snow was placed into the permeameter and retained for sampling. In addition, the time, date and location (i.e. city or town) associated with the snow samples should be noted to provide context.

Subject to the decision of the editor, the paper can be: (a) published without reference to snow; or (b) published with some testing on snow. If the authors are willing to revise the paper to once again provide details related to testing on snow, I will quickly review the paper and perhaps this paper can be submitted for complete publication in the journal. Ideally, this could be done within the next month.

**B. Specific Comments**

None at this time, but I will add additional comments if necessary when the paper is revised to re-add the data related to snow. The authors have taken into consideration the salient points of the comments given with respect to the first draft.
